# Supplementary material
Source: Springer Nature journal article supplement (http://www.springermedizin.de/resource/supplementary/12891_2007_387_MOESM2_ESM.pdf/9510936)

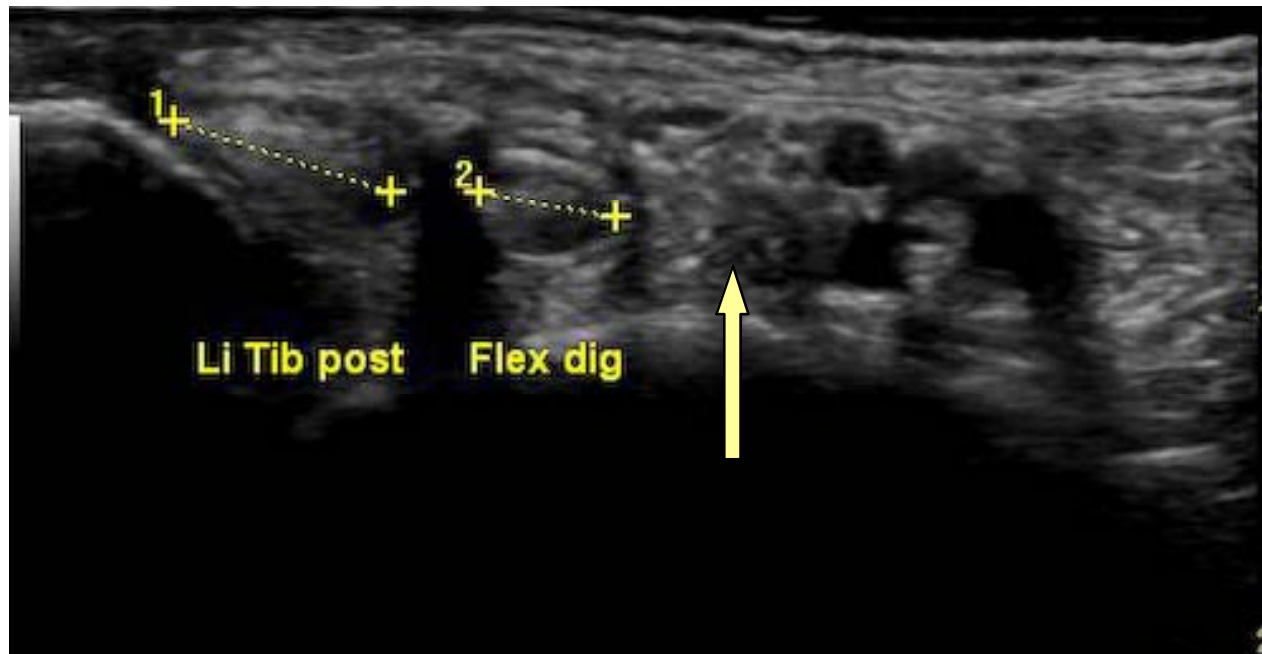

Supplement: MOESM2 [file 9510936]
